# Supplementary material for: Novel assessment of numerical forecasting model relative humidity with satellite probabilistic estimates
Source: Copernicus journal article supplement (doi:10.5194/acp-22-3811-2022), 2022-03-22
Supplement: Supplementary file 1 [file acp-22-3811-2022-supplement.zip]

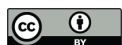

## *Supplement of*

# **Novel assessment of numerical forecasting model relative humidity with satellite probabilistic estimates**

**Chloé Radice et al.**

*Correspondence to:* Chloé Radice ([chloe.radice@latmos.ipsl.fr](mailto:chloe.radice@latmos.ipsl.fr))

- [acp-22-3811-2022-supplement-title-page.pdf](#)
- Supplementary Mat
  - [supp\\_mat\\_L1.png](#)
  - [supp\\_mat\\_L2.png](#)
  - [supp\\_mat\\_L3.png](#)
  - [supp\\_mat\\_L4.png](#)
  - [supp\\_mat\\_L5.png](#)
  - [supp\\_mat\\_L6.png](#)

The copyright of individual parts of the supplement might differ from the article licence.
